# Supplementary material for: WO3 nanorolls self-assembled as thin films by hydrothermal synthesis
Source: Royal Society of Chemistry journal article supplement (doi:10.1039/c4nr07290a), 2015-01-01
Supplement: c4nr07290a1.pdf [file c4nr07290a1.pdf]

## SUPPORTING INFORMATION

### **WO<sub>3</sub> Nanorolls Self-Assembled as Thin Films by Hydrothermal Synthesis**

S. Vankova<sup>a</sup>, S. Zanarini<sup>a\*</sup>, J. Amici<sup>a</sup>, Fernando Cámara<sup>b,c</sup>, Rossella Arletti<sup>b,c</sup>,  
S. Bodoardo<sup>a</sup>, N. Penazzi<sup>a</sup>

<sup>a</sup> Department of Applied Science and Technology - DISAT, Politecnico di Torino, C.so Duca degli Abruzzi 24, 10129 Torino, Italy.

<sup>b</sup> Dipartimento di Scienze della Terra, Università di Torino, via Valperga Caluso 35, 10125, Torino, Italy.

<sup>c</sup> NIS Centre of Excellence, Università di Torino, Via Giuria 7, 10125 Torino, Italy.

#### **Characterization techniques**

CH Instrument 600D Station (galvanostat/potentiostat, CHI instruments, Austin, USA) was used for electrochemical and opto-electrochemical measurements, by registering current vs. potential and current vs. time curves. Cyclic voltammeteries of the cathodes were registered in 1 M Lithium bis-trifluoromethanesulfonimide (LiTFSI) in Propylene Carbonate (PC) with a standard three electrode cell with WO<sub>3</sub> nanorolls thin film on ITO glass as working electrode, a Platinum plate as counter electrode and an Ag/AgCl electrode as reference. Spectro-electrochemical measurements were carried out by placing the custom-made cell in the sample compartment of a Varian Cary 500 UV-VIS spectrophotometer. Two different types of measurement were performed by coupling the spectrophotometer with the CH 600D potentiostat. The first type of experiment was the registration of the complete UV-VIS absorption spectrum as function of applied potential; the second type of experiment consisted in the acquisition of the visible light absorption at a specific wavelength as function of time during potential modulation i. e. repeated bleaching and coloring cycles. The switching time for Bleaching ( $ST_B$ ) and the switching time for coloring ( $ST_C$ ) can be easily calculated from the T% vs. time curves by the time necessary after bias inversion to reach the 80% of the maximum (bleaching, oxidation) or minimum (coloring, reduction) T% starting from

previous potential step minimum or maximum T% respectively. The electrochemical impedance spectroscopy (EIS) response was analyzed in the frequency range 10 mHz - 1 MHz at the open circuit potential, using the previously described CH 600D potentiostat equipped with a proprietary fitting software.

The morphology of the products was observed by field emission scanning electron microscopy (FESEM, Hitachi S-4300SE). The crystallographic phases of the fabricated thin films were examined by X-ray diffraction (XRD, Philips X'pert MRD diffractometer) using Cu K $\alpha$  radiation. The size and crystal structure of the hydrothermally-grown WO<sub>3</sub> nanorolls were also confirmed by high resolution transmission electron microscopy (HR-TEM), selected area electron diffraction (SAED) using a JEOL Jem 3010 uhr, working at 300 kV, a LaB6 source and a Gatan CCD camera attached. Sample was dropped on a copper mounted holey carbon film.

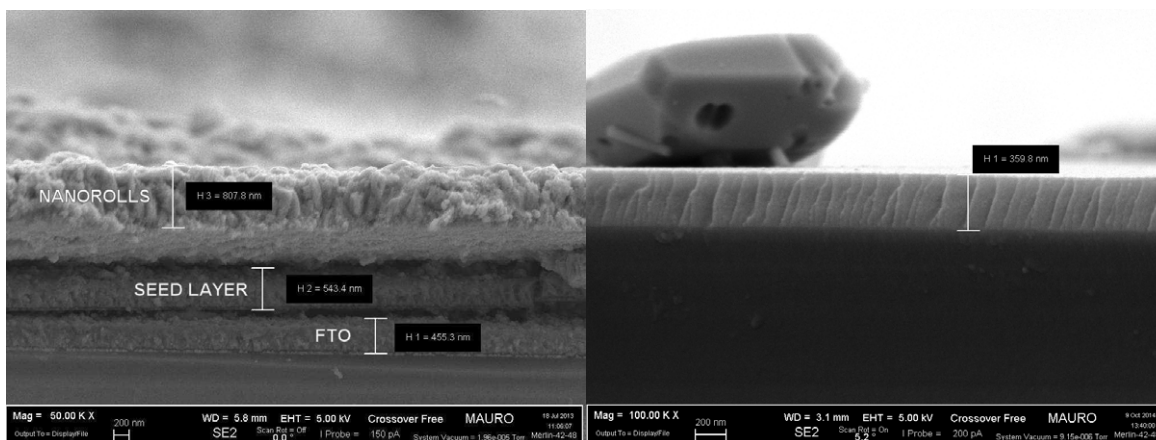

**Figure S1.** (left) FESEM micrograph showing the typical layer-by-layer aspect of the thin layer of WO<sub>3</sub> nanorolls obtained here. The seed layer was obtained with PVA of 85-124 000 u. m. a. ; (right) Cross section of a thin layer of WO<sub>3</sub> nanorolls with seed layer obtained with PVA of 31000-50000 u. m. a. .

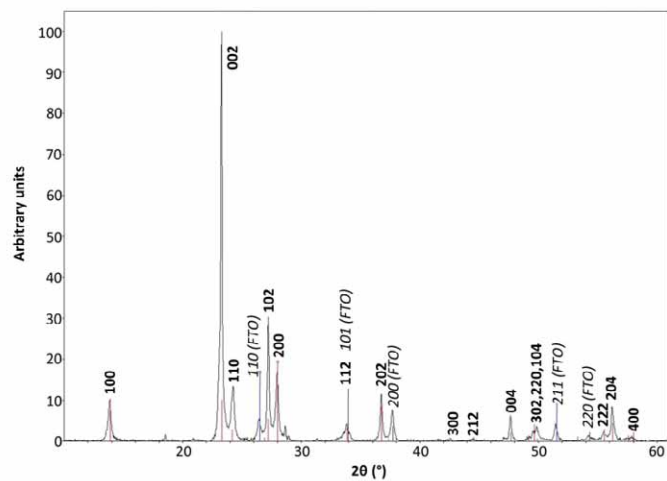

**Figure S2.** Typical XRD pattern of  $\text{WO}_3$  nanorolls thin film on FTO/glass substrate.

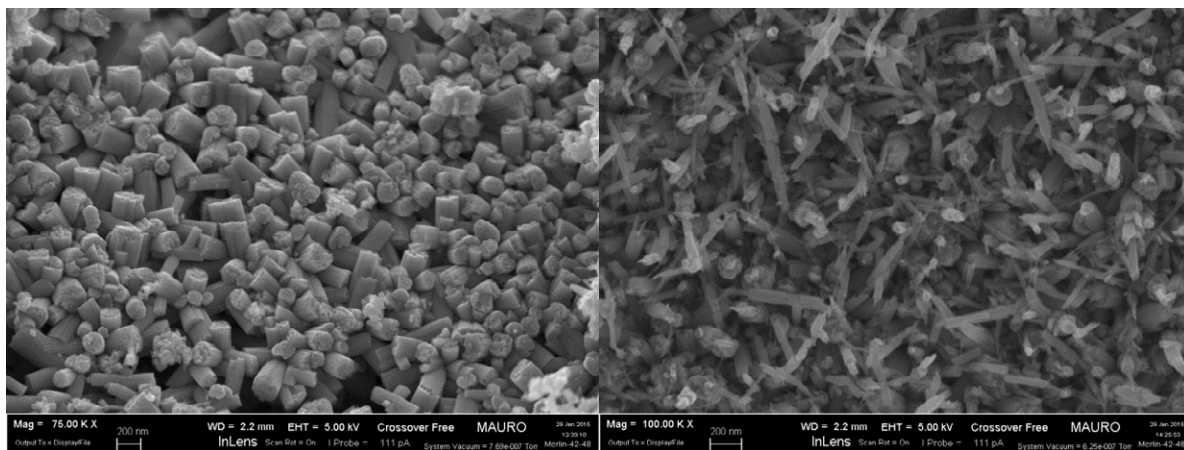

**Figure S3.** (Left) FESEM Picture showing the typical firewood-like fragmented  $\text{WO}_3$  nanorolls (shorter PVA Chain) obtained by scratching away the thin layer on Lacey Carbon/200 nm Cu mesh; (right) FESEM shot showing the typical elongated and thinner structure of  $\text{WO}_3$  NR on FTO glass (longer PVA chain).

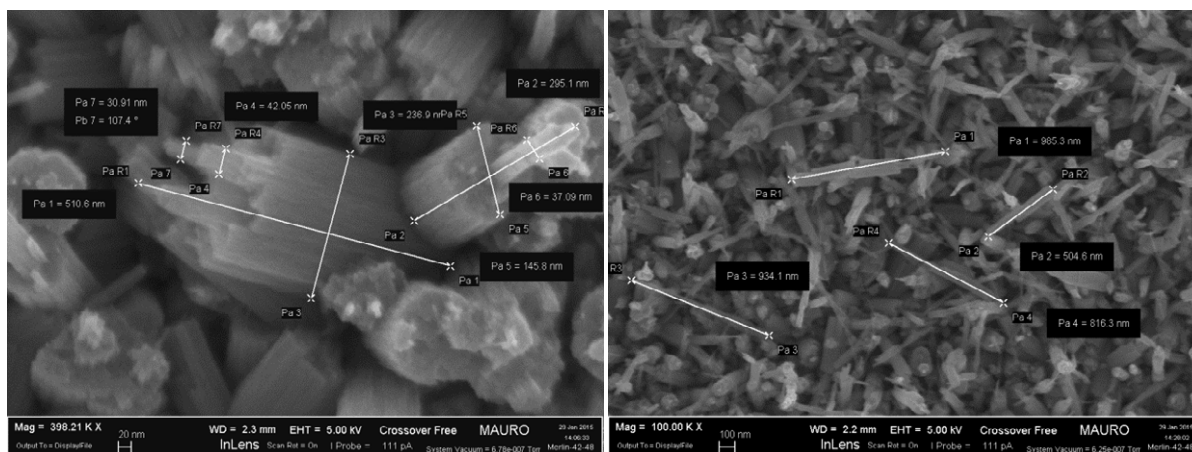

**Figure S4.** FESEM Pictures showing examples of measurement of diameter and length of the  $\text{WO}_3$  NR obtained in different preparative conditions.

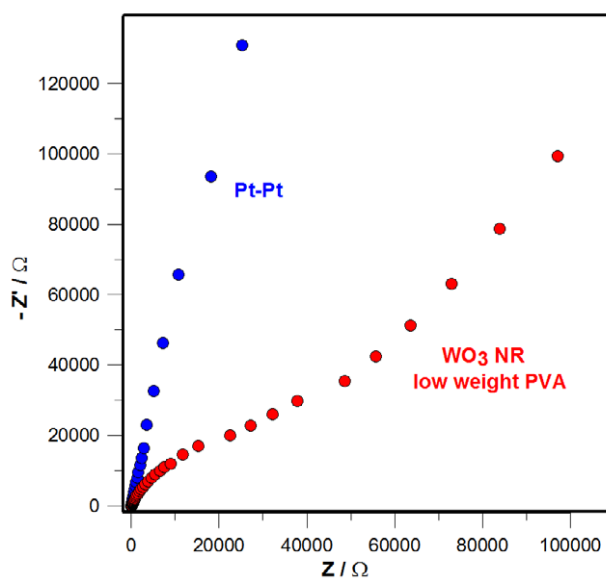

**Figure S5.** Typical Nyquist Plots at ambient temperature in PC 1M LiTFSi solution. Electrodes setup: (blue dots ) Pt plate | Pt plate | Ag/AgCl reference and (red dots)  $\text{WO}_3$  nanorolls/FTO | Pt plate | Ag/AgCl reference. Frequency range: 10 mHz - 1 MHz at the open circuit potential.

| PVA Chain weight / UMA | Overall $\text{WO}_3$ NR length / nm | Log portion length / nm | Log portion diameter / nm | Tip portion diameter / nm |
|------------------------|--------------------------------------|-------------------------|---------------------------|---------------------------|
| 31000-50000            | 300-650                              | 200-600                 | 200-300                   | 20-50                     |
| 85000-124000           | 500-900                              | 200-500                 | 75-150                    | 20-50                     |
| 146000-186000          | 750-1300                             | 650-1200                | 75-150                    | 20-50                     |

**Table S1.** Indicative diameter and length of  $\text{WO}_3$  NR by varying PVA chain length in seed layer preparation. These range values are based on 20 single NR measurements taken by FESEM pictures.

| WO <sub>3</sub> NR/ glass FTO | Cycle nr. 5 | Cycle nr. 2000 |
|-------------------------------|-------------|----------------|
| ST <sub>B</sub> <sup>I</sup>  | 8 s         | 8 s            |
| ST <sub>C</sub> <sup>II</sup> | 9 s         | 9 s            |
| ΔT%(550 nm)                   | 26 %        | 21 %           |
| ΔT%(700 nm)                   | 33 %        | 27 %           |

<sup>I</sup> Switching Time of bleaching for 80% ΔT%max at 550 nm by applying a potential of -2 to 0V vs. Ag/AgCl.

<sup>II</sup> Switching Time of coloring for 80% ΔT%max at 550 nm by applying a potential of 0 to -2V vs. Ag/AgCl.

**Table S2.** Effect of 2000 cycles of electrochemical switching on the ST<sub>B</sub>, ST<sub>C</sub> and ΔT% of WO<sub>3</sub> nanorolls . Electrolyte: LiTFSI 1 M in Propylene Carbonate. Electrodes setup: Nanorolls film on glass FTO (low M.W. PVA) as Working, Platinum plate as counter and Ag/AgCl electrode as reference. Potential program: E<sub>1</sub>= +0 V, E<sub>2</sub>= -2 V; t<sub>1</sub>=t<sub>2</sub>=40 s.

| Nanocrystal type                                    | Coloration Efficiency η (cm <sup>2</sup> C <sup>-1</sup> ) <sup>*</sup> |
|-----------------------------------------------------|-------------------------------------------------------------------------|
| WO <sub>3</sub> nanoflakes                          | 60±8                                                                    |
| WO <sub>3</sub> nanorolls (M.W. PVA= 31000-50000)   | 67±6                                                                    |
| WO <sub>3</sub> nanorolls (M.W. PVA= 85000-124000)  | 53±5                                                                    |
| WO <sub>3</sub> nanorolls (M.W. PVA= 146000-186000) | 39±7                                                                    |

\* based on 5 different samples of each type

**Table S3.** Coloration Efficiency of the WO<sub>3</sub> NR produced by HT synthesis in different conditions and comparison with WO<sub>3</sub> nanoflakes produced by the Su method.
